# Supplementary material for: Modulating the Graphitic Domains and Pore Structure of Corncob-Derived Hard Carbons by Pyrolysis to Improve Sodium Storage
Source: MDPI journal article supplement (doi:10.3390/molecules28083595), 2023-04-20
Supplement: s1 [file s1]

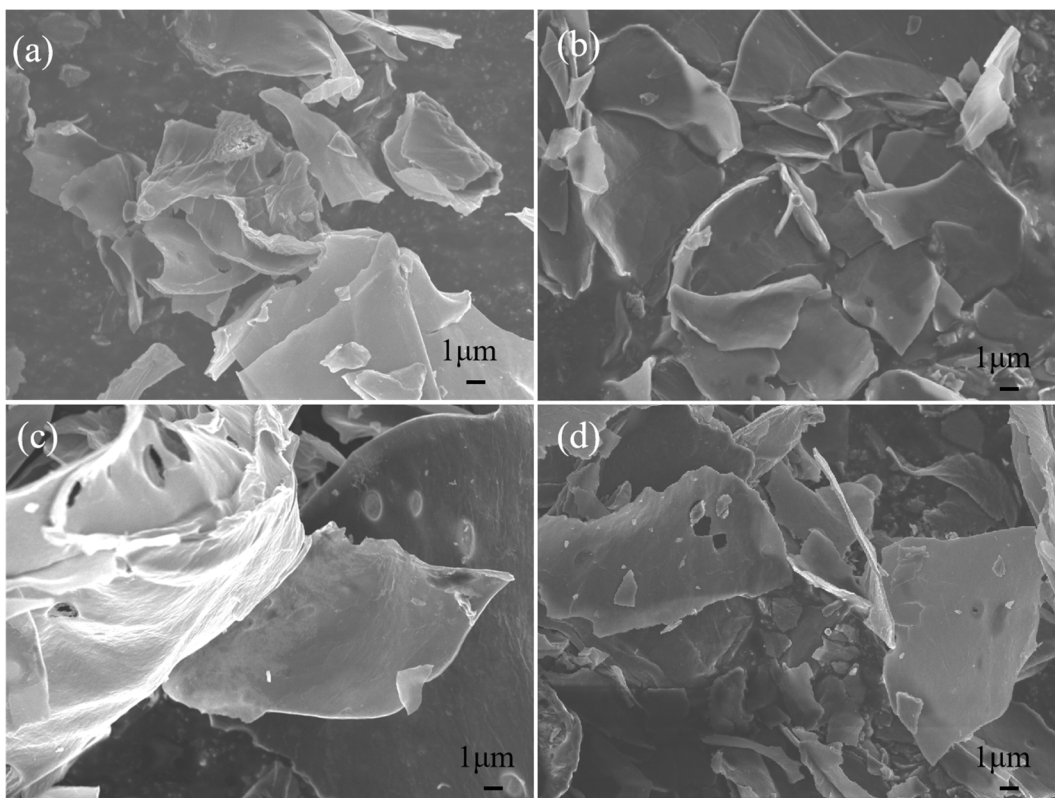

**Figure S1.** SEM images of CC-1000(a), CC-1200(b), CC-1400(c), CC-1600(d).

**Table S1.** The percent of C, O atoms and functionalities calculated by XPS.

|         | C atoms(%) | O atoms(%) | C=C(%) | C-C(%) | C-O(%) | C=O(%) |
|---------|------------|------------|--------|--------|--------|--------|
| CC-1000 | 92.37      | 7.20       | 25.80  | 44.56  | 13.05  | 8.96   |
| CC-1200 | 93.94      | 5.96       | 27.61  | 44.04  | 13.94  | 8.85   |
| CC-1400 | 95.45      | 2.87       | 29.91  | 42.32  | 15.98  | 7.24   |
| CC-1600 | 94.89      | 5.02       | 26.65  | 48.30  | 15.57  | 4.37   |
